# Supplementary material for: Albumin-controlled stereoselective reduction of 1,3-diketones to anti-diolsElectronic supplementary information (ESI) available: Scatchard and Lineweaver–Burk plots. See http://www.rsc.org/suppdata/cc/b2/b200474g/
Source: Royal Society of Chemistry journal article supplement (doi:10.1039/b200474g), 2002-03-15
Supplement: b200474g.doc [file b200474g.doc]

**Supplementary data**

**Albumin-controlled stereoselective reduction of 1,3-diketones to *anti*-diols.**

**Fabio Benedetti,* Federico Berti,* Ivan Donati, Massimo Fregonese.**

Dipartimento di Scienze Chimiche, Università di Trieste, Via Giorgieri 1, I-34127 Trieste, Italy.

[berti@dsch.univ.trieste.it](mailto:berti@dsch.univ.trieste.it)

______________________________________________________________

**CD studies on diketone and hydroxyketone binding**

All CD spectra were recorded on a Jasco J-710 spectropolarimeter fitted with a 1 cm cell, from 4 scans at 20 nm/min. The Scatchard plot of Fig. 1 was obtained from the ellipticity  measured at 330 nm, with 60 M BSA and concentrations of diketone **1b** ranging from 30 to 180 M, assuming that the molar ratio, *r*, of bound diketone to protein is at any point given by , where  is the ellipticity value at full saturation of the protein. Values of 2.4x104 l mol-1 for the association constant K and of 0.96 for the number of binding sites *n* were obtained by fitting the experimental points to to the equation *r*/[**1b**] = *n*/K - *r*/K.

**Figure 1**

The Lineweaver-Burk plot of fig. 2 was obtained form the ellipticities measured at 330 nm, with 60 M BSA and concentrations of diketone **1b** ranging from 10 to 140 M (yellow line). The red line refers to the same experiment carried out in the presence of 600 M hydroxyketone **2b**.

**Figure 2**
